# Supplementary material for: Steam treatment of a hollow lithium phosphate catalyst: enhancing carbon deposition resistance and improving the catalytic performance of propylene oxide rearrangement
Source: Royal Society of Chemistry journal article supplement (doi:10.1039/c6ra09559c), 2016-01-01
Supplement: c6ra09559c1.pdf [file c6ra09559c1.pdf]

## Supplementary Material

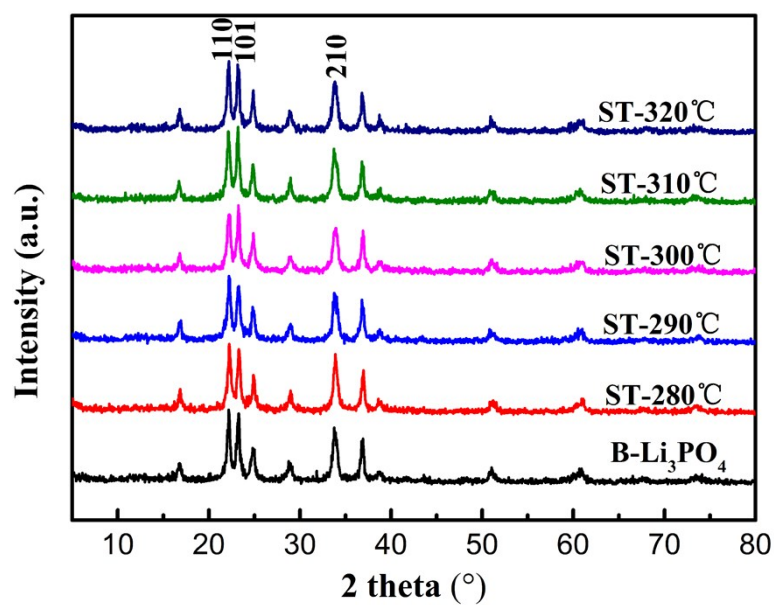

**Fig. S1.** XRD patterns of Li<sub>3</sub>PO<sub>4</sub> catalysts treated with steam at different temperatures.
